# Supplementary material
Source: publisher figshare collection journal article supplement (https://aacr.figshare.com/articles/dataset/_/22430109)

Supplementary Figure S5.

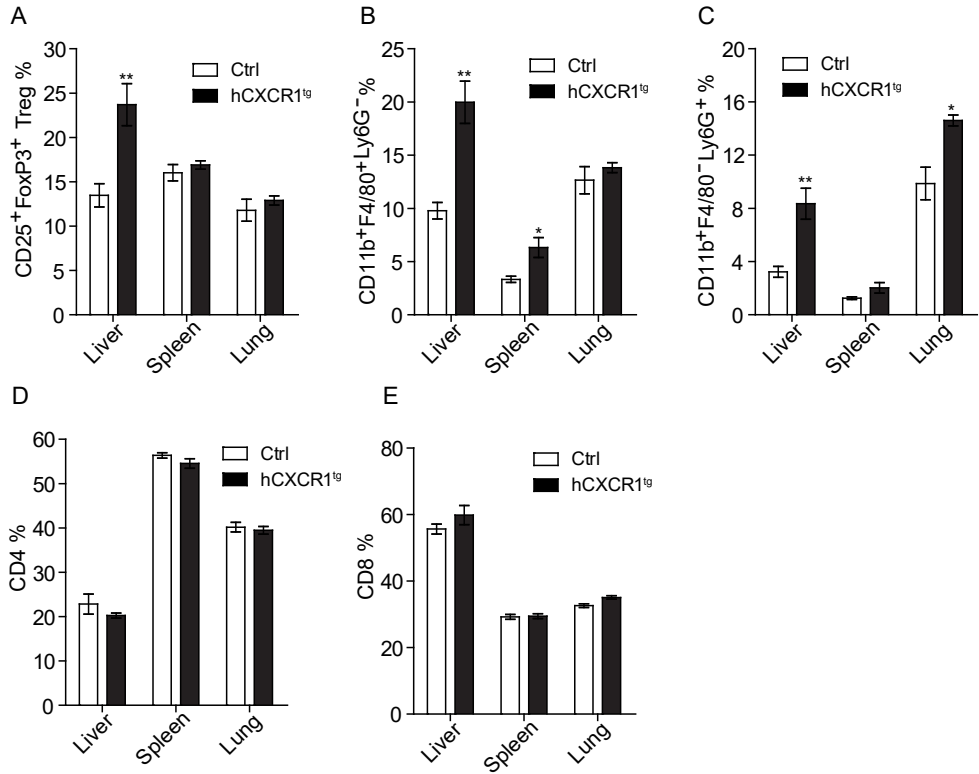

Supplement: Supplementary file 1 [file 39876441]
